# Supplementary material for: Spatial niche formation but not malignant progression is a driving force for intratumoural heterogeneity
Source: PubMed Central journal article supplement (PMC4910022; doi:10.1038/ncomms11845), 2016-06-13
Supplement: ncomms11845-s1.pdf [file ncomms11845-s1.pdf]

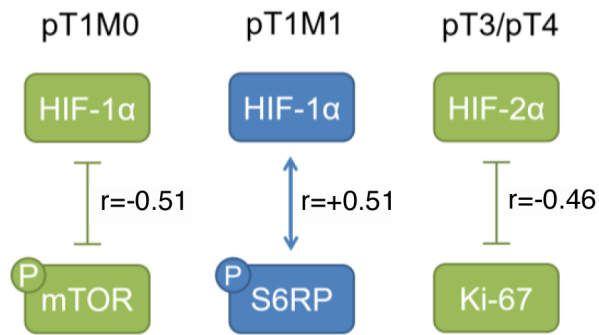

**Supplementary Figure 1. Overview of changes in signaling cascades inferred from correlative marker analysis.**

The correlation coefficient  $r$  demonstrates a positive (blue) or negative (green) correlation. Original data are shown in Supplementary Table 4.

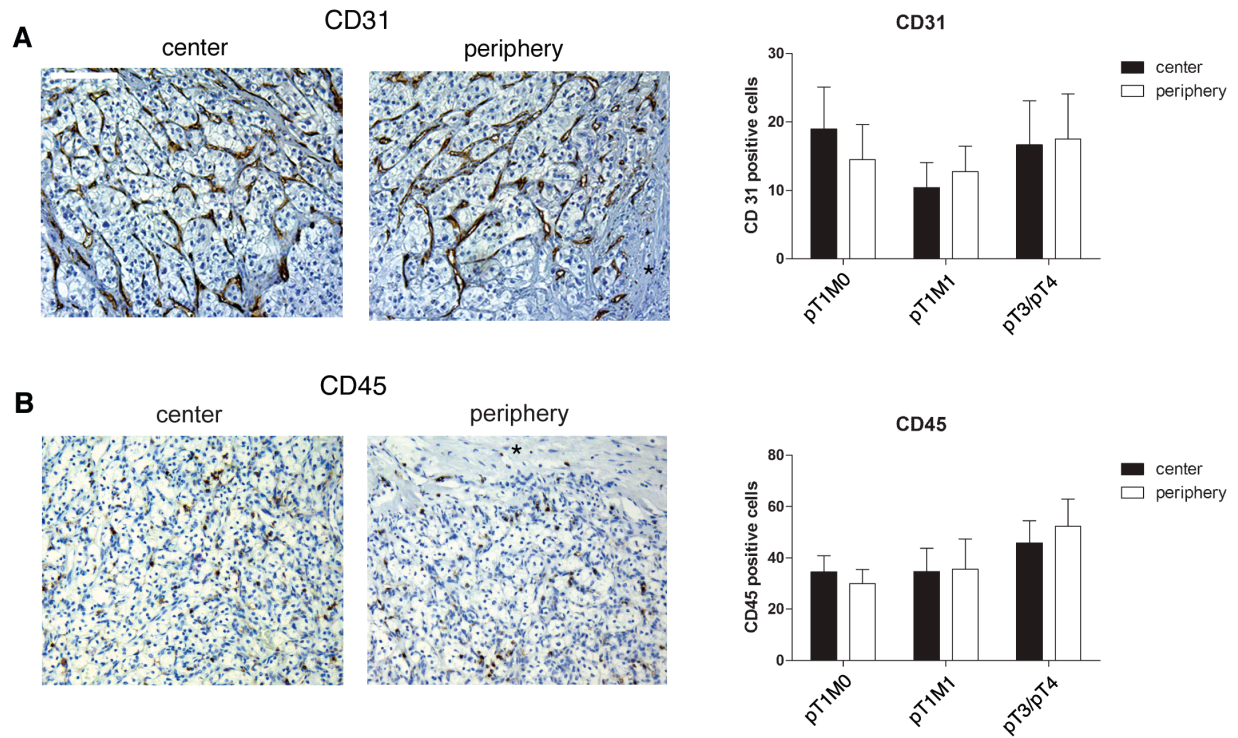

**Supplementary Figure 2. Microvessel density and leukocyte admixture are similar in the tumor center and periphery.**

(A,B) Representative immunohistochemical stainings for CD31 and CD45 to visualize blood vessels and leukocytes, respectively. Asterisks denote the adjacent stroma. Scale bar indicates 100  $\mu$ m. Bar graphs show mean + s.e.m. of positive cells per 40x high power field (HPF) for vital (>90%) tumor areas of the center (black) and periphery (white) for tumor subgroups as indicated. At least five HPFs were counted per region and per tumor.

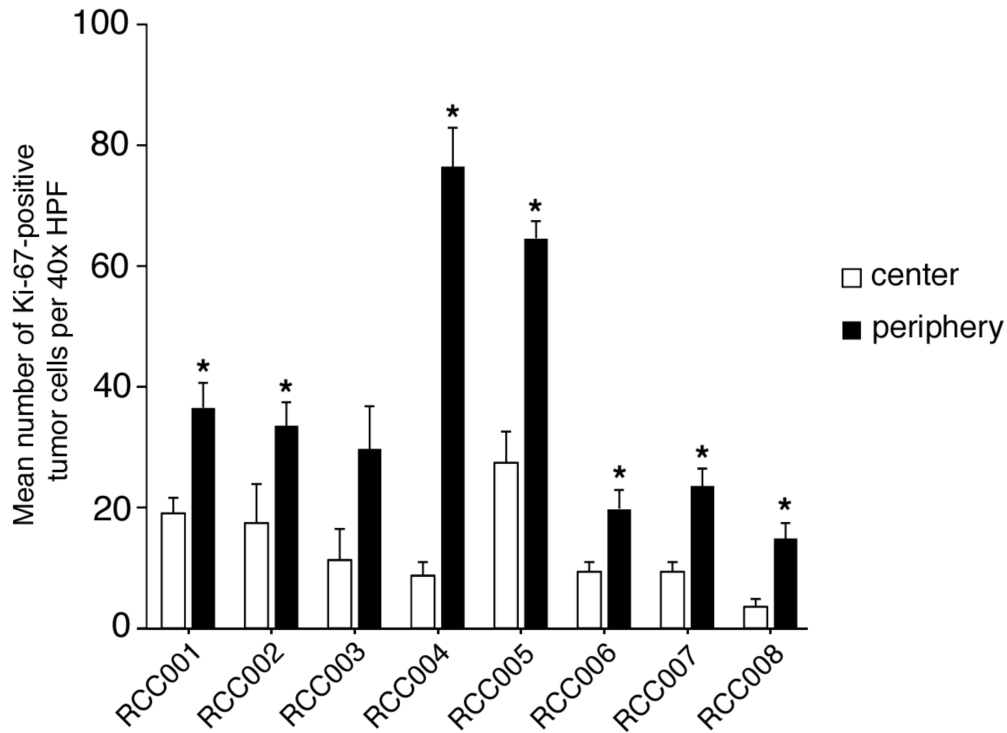

**Supplementary Figure 3. Zonal pattern of functional heterogeneity in eight ccRCCs analyzed by regional whole exome sequencing.**

Bar graph shows mean + s.e.m. of Ki-67-positive cells per 40x high power field (HPF) for vital (>90%) tumor areas of the center (white) and periphery (black) for the tumors indicated. At least five HPFs were counted per area and per tumor. Asterisks indicate statistically significant differences ( $p < 0.05$ ; Mann-Whitney U test).

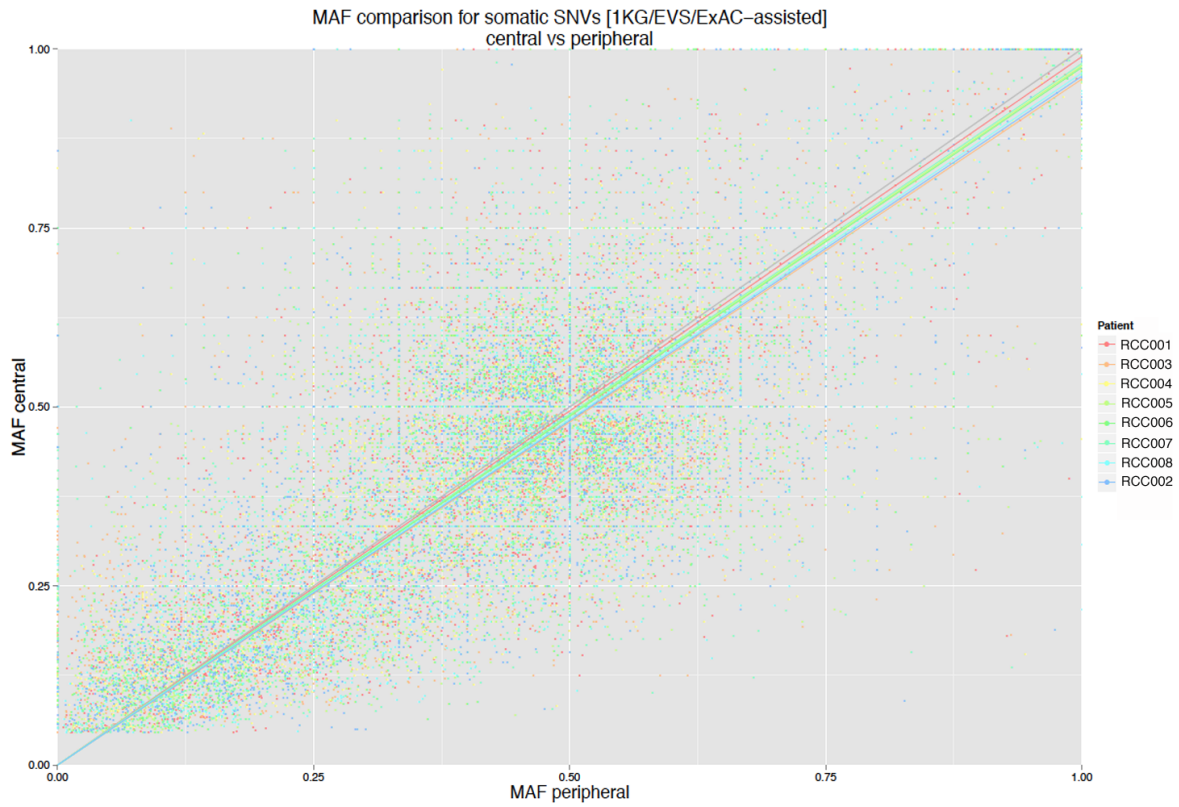

**Supplementary Figure 4. Mutant allele frequencies (MAFs) in the tumor center and periphery.**

Note the similar distribution of MAFs in the center and periphery indicating that results are not caused by an unequal admixture of non-tumorous cells.

**Supplementary Table 1. Patient characteristics (n=30, all ccRCCs)**

---

| Parameter              | n= | %     |
|------------------------|----|-------|
| Sex                    |    |       |
| Male                   | 20 | 66.7% |
| Female                 | 10 | 33.3% |
| Age at diagnosis (yrs) |    |       |
| <65                    | 20 | 66.7% |
| ≥65                    | 10 | 33.3% |
| Tumor stage            |    |       |
| pT1                    | 19 | 63.3% |
| pT3/4                  | 11 | 36.7% |
| Lymph node metastasis  |    |       |
| N0/pN0                 | 28 | 93.3% |
| N1/pN1                 | 2  | 6.7%  |
| Distant metastasis     |    |       |
| M0                     | 12 | 40%   |
| M1                     | 18 | 60%   |
| pTNM                   |    |       |
| pT1 N0 M0              | 9  | 30%   |
| pT1 N0 M1              | 10 | 33.3% |
| pT3/4 N0 M0            | 3  | 10%   |
| pT3/4 N0 M1            | 6  | 20%   |
| pT3/4 N1 M1            | 2  | 6.7%  |
| Fuhrman Grade          |    |       |
| G1/2                   | 22 | 73.3% |
| G3/4                   | 8  | 26.7% |

---

## Supplementary Table 2. Overview of test results

| D'Agostino-Pearson Omnibus Test                   | pT1M0 | pT1M1 | pT3/pT4 | all* |
|---------------------------------------------------|-------|-------|---------|------|
| <b>negative samples</b>                           | 35    | 30    | 40      | 105  |
| <b>significant (<math>p \leq 0.05</math>)</b>     | 35    | 30    | 40      | 105  |
| <b>non-significant (<math>p &gt; 0.05</math>)</b> | 0     | 0     | 0       | 0    |
| <b>%</b>                                          | 78%   | 67%   | 73%     | 72%  |
| <b>positive samples</b>                           | 10    | 15    | 15      | 40   |
| <b>significant (<math>p \leq 0.05</math>)</b>     | 0     | 0     | 0       | 0    |
| <b>non-significant (<math>p &gt; 0.05</math>)</b> | 10    | 15    | 15      | 40   |
| <b>%</b>                                          | 22%   | 33%   | 27%     | 28%  |

\*one tumor omitted due to insufficient number of data points

**Supplementary Table 3. Correlation of tumor heterogeneity with Fuhrman grade**

|                | STDEV (median) |      |                  | MAX- $\mu$ (median) |      |                  |
|----------------|----------------|------|------------------|---------------------|------|------------------|
|                | G1/2           | G3/4 | <i>p</i> -value* | G1/2                | G3/4 | <i>p</i> -value* |
| HIF-1 $\alpha$ | 10.8           | 6.6  | 0.38             | 24.7                | 15.3 | 0.27             |
| HIF-2 $\alpha$ | 14.1           | 10.5 | 0.47             | 29.7                | 18.8 | 0.33             |
| p-mTOR         | 2.2            | 0.3  | 0.08             | 8.8                 | 3.5  | 0.21             |
| p-S6RP         | 1.7            | 3.3  | 0.12             | 5.5                 | 13.4 | 0.09             |
| Ki-67          | 1.8            | 3.2  | 0.1              | 6.7                 | 15.8 | 0.08             |

\*Mann Whitney U test

## Supplementary Table 4. Correlation between markers

| <b>pT1M0</b>     |        |         |                |                |       |
|------------------|--------|---------|----------------|----------------|-------|
| coefficient (r)* | p-mTOR | p-S6RP  | HIF-1 $\alpha$ | HIF-2 $\alpha$ | Ki-67 |
| p-mTOR           |        | 0.51    | -0.51          | -0.07          | -0.11 |
| p-S6RP           | 0.51   |         | -0.25          | -0.05          | -0.38 |
| HIF-1 $\alpha$   | -0.51  | -0.25   |                | 0.42           | -0.07 |
| HIF-2 $\alpha$   | -0.07  | -0.05   | 0.42           |                | -0.27 |
| Ki-67            | -0.11  | -0.38   | -0.07          | -0.27          |       |
| p-value          | p-mTOR | p-S6RP  | HIF-1 $\alpha$ | HIF-2 $\alpha$ | Ki-67 |
| p-mTOR           |        | <0.01   | <0.01          | 0.10           | 0.01  |
| p-S6RP           | <0.01  |         | <0.01          | 0.30           | <0.01 |
| HIF-1 $\alpha$   | <0.01  | <0.01   |                | <0.01          | 0.11  |
| HIF-2 $\alpha$   | 0.10   | 0.30    | <0.01          |                | <0.01 |
| Ki-67            | 0.01   | <0.01   | 0.11           | <0.01          |       |
| <b>pT1M1</b>     |        |         |                |                |       |
| coefficient (r)* | p-mTOR | p-S6RP  | HIF-1 $\alpha$ | HIF-2 $\alpha$ | Ki-67 |
| p-mTOR           |        | 0.48    | 0.10           | -0.10          | 0.24  |
| p-S6RP           | 0.48   |         | 0.51           | 0.21           | 0.28  |
| HIF-1 $\alpha$   | 0.10   | 0.51    |                | 0.43           | 0.19  |
| HIF-2 $\alpha$   | -0.10  | 0.21    | 0.43           |                | -0.18 |
| Ki-67            | 0.24   | 0.28    | 0.19           | -0.18          |       |
| p-value          | p-mTOR | p-S6 RP | HIF-1 $\alpha$ | HIF-2 $\alpha$ | Ki-67 |
| p-mTOR           |        | <0.01   | <0.01          | 0.01           | <0.01 |
| p-S6RP           | <0.01  |         | <0.01          | <0.01          | <0.01 |
| HIF-1 $\alpha$   | <0.01  | <0.01   |                | <0.01          | <0.01 |
| HIF-2 $\alpha$   | 0.01   | <0.01   | <0.01          |                | <0.01 |
| Ki-67            | <0.01  | <0.01   | <0.01          | <0.01          |       |
| <b>pT3/T4</b>    |        |         |                |                |       |
| coefficient (r)* | p-mTOR | p-S6RP  | HIF-1 $\alpha$ | HIF-2 $\alpha$ | Ki-67 |
| p-mTOR           |        | -0.09   | 0.35           | 0.16           | -0.01 |
| p-S6RP           | -0.09  |         | 0.12           | 0.14           | 0.08  |
| HIF-1 $\alpha$   | 0.35   | 0.12    |                | 0.24           | 0.11  |
| HIF-2 $\alpha$   | 0.16   | 0.14    | 0.24           |                | -0.46 |
| Ki-67            | -0.01  | 0.08    | 0.11           | -0.46          |       |
| p-value          | p-mTOR | p-S6RP  | HIF-1 $\alpha$ | HIF-2 $\alpha$ | Ki-67 |
| p-mTOR           |        | 0.03    | <0.01          | <0.01          | 0.84  |
| p-S6RP           | 0.03   |         | <0.01          | <0.01          | 0.04  |
| HIF-1 $\alpha$   | <0.01  | <0.01   |                | <0.01          | 0.01  |
| HIF-2 $\alpha$   | <0.01  | <0.01   | <0.01          |                | <0.01 |
| Ki-67            | 0.84   | 0.04    | 0.01           | <0.01          |       |
| <b>all</b>       |        |         |                |                |       |
| coefficient (r)* | p-mTOR | p-S6RP  | HIF-1 $\alpha$ | HIF-2 $\alpha$ | Ki-67 |
| p-mTOR           |        | 0.25    | -0.10          | -0.02          | -0.01 |
| p-S6RP           | 0.25   |         | 0.18           | 0.13           | 0.05  |
| HIF-1 $\alpha$   | -0.10  | 0.18    |                | 0.38           | 0.07  |
| HIF-2 $\alpha$   | -0.02  | 0.13    | 0.38           |                | -0.29 |
| Ki-67            | -0.01  | 0.05    | 0.07           | -0.29          |       |
| p-value          | p-mTOR | p-S6RP  | HIF-1 $\alpha$ | HIF-2 $\alpha$ | Ki-67 |
| p-mTOR           |        | <0.01   | <0.01          | 0.52           | 0.76  |
| p-S6RP           | <0.01  |         | <0.01          | <0.01          | 0.05  |
| HIF-1 $\alpha$   | <0.01  | <0.01   |                | <0.01          | <0.01 |
| HIF-2 $\alpha$   | 0.52   | <0.01   | <0.01          |                | <0.01 |
| Ki-67            | 0.76   | 0.05    | <0.01          | <0.01          |       |

\*Spearman correlation for non-parametric variables.

Blue indicates a positive correlation, green indicates a negative correlation.



**Supplementary Table 5. Patient characteristics and distribution of functional SNVs and Indels**

| Patient | Sex/Age | pT Stage | Grade* | Center-specific functional SNVs and Indels (n) | Periphery-specific functional SNVs (n) |
|---------|---------|----------|--------|------------------------------------------------|----------------------------------------|
| RCC001  | M/75    | pT1a     | 2      | 4                                              | 10                                     |
| RCC002  | M/63    | pT1a     | 2      | 3                                              | 0                                      |
| RCC003  | M/75    | pT1a     | 2      | 24                                             | 1                                      |
| RCC004  | M/44    | pT2a     | 3      | 7                                              | 3                                      |
| RCC005  | M/82    | pT4      | 3      | 3                                              | 0                                      |
| RCC006  | F/35    | pT1b     | 2      | 6                                              | 0                                      |
| RCC007  | F/63    | pT2a     | 2      | 15                                             | 4                                      |
| RCC008  | F/69    | pT1a     | 1      | 6                                              | 2                                      |
| total   |         |          |        | 68                                             | 20                                     |

\*All RCCs with clear cell histology.
